# Supplementary material
Source: PubMed Central journal article supplement (PMC4110163)
Supplement: NIHMS587095-supplement-Supp_TableS1-S4.pdf [file NIHMS587095-supplement-Supp_TableS1-S4.pdf]

**Supplementary Table 1. Health Eating Index-2005 components and standards for scoring\***

|                                                                              | <b>Score range</b> | <b>Criteria for maximum score</b> | <b>Criteria for minimum score (0)</b> |
|------------------------------------------------------------------------------|--------------------|-----------------------------------|---------------------------------------|
| <i>Adequacy component (higher score indicates higher consumption)</i>        |                    |                                   |                                       |
| Total fruit <sup>†</sup>                                                     | 0-5                | ≥0.8 cups/1,000 kcal              | No intake                             |
| Whole fruits (not juice) <sup>†</sup>                                        | 0-5                | ≥0.4 cups/1,000 kcal              | No intake                             |
| Total vegetables <sup>†</sup>                                                | 0-5                | ≥1.1 cups/1,000 kcal              | No intake                             |
| Dark-green and orange vegetables and legumes <sup>†</sup>                    | 0-5                | ≥0.4 cups/1,000 kcal              | No intake                             |
| Total grains <sup>†</sup>                                                    | 0-5                | ≥3 ounces/1,000 kcal              | No intake                             |
| Whole grains <sup>†</sup>                                                    | 0-5                | ≥1.5 ounces/1,000 kcal            | No intake                             |
| Milk <sup>†</sup>                                                            | 0-10               | ≥1.3 cups/1,000 kcal              | No intake                             |
| Meat and beans <sup>†</sup>                                                  | 0-10               | ≥2.5 ounces/1,000 kcal            | No intake                             |
| Oils <sup>†</sup>                                                            | 0-10               | ≥12 g/1,000 kcal                  | No intake                             |
| <i>Moderation component (higher score indicates lower consumption)</i>       |                    |                                   |                                       |
| Saturated fat <sup>‡</sup>                                                   | 0-10               | ≤7% kcal                          | ≥15% kcal                             |
| Sodium <sup>‡</sup>                                                          | 0-10               | ≤700 mg/1,000 kcal                | ≥2,000 mg/1,000 kcal                  |
| Calories from Solid Fats, Alcoholic beverages, and Added Sugars <sup>‡</sup> | 0-20               | ≤20% kcal                         | ≥50% kcal                             |

\* 1 ounce = 28.35 g; 1 cup = 0.24 L. 12 components were scored for a total of 0 to 100 points.

<sup>†</sup> For these nine components with recommended minimum intakes, a higher score was awarded for higher consumption. Intakes between the minimum and maximum levels were scored proportionately.

<sup>‡</sup> For these components with recommended minimum intakes, a higher score was awarded for lower consumption. Saturated fat was awarded 8 for the intake accounting for 10% of calories. Sodium was awarded 8 for intake of 1,100 mg/1,000 kcal.

**Supplementary Table 2. Health Eating Index-2010 components and standards for scoring\***

|                                                                         | <b>Change from HEI-2005</b>                                                                                                    | <b>Score range</b> | <b>Criteria for maximum score*</b> | <b>Criteria for minimum score (0)</b> |
|-------------------------------------------------------------------------|--------------------------------------------------------------------------------------------------------------------------------|--------------------|------------------------------------|---------------------------------------|
| <i>Adequacy components (higher score indicates higher consumption)</i>  |                                                                                                                                |                    |                                    |                                       |
| <b>Total fruit</b>                                                      | No change                                                                                                                      | 0-5                | ≥0.8 cups/1,000 kcal               | No intake                             |
| <b>Whole fruits (not juice)</b>                                         | No change                                                                                                                      | 0-5                | ≥0.4 cups/1,000 kcal               | No intake                             |
| <b>Total vegetables<sup>†</sup></b>                                     | Minor change from HEI-2005: includes beans and peas (legumes) here when not counted as total protein foods.                    | 0-5                | ≥1.1 cups/1,000 kcal               | No intake                             |
| <b>Greens and Beans<sup>†</sup></b>                                     | Includes dark green vegetables and beans and peas (legumes), replaces dark green and orange vegetables and legumes in HEI-2005 | 0-5                | ≥0.2 cups/1,000 kcal               | No intake                             |
| <b>Whole grains</b>                                                     | The maximum point changed to 10                                                                                                | 0-10               | ≥1.5 ounces/1,000 kcal             | No intake                             |
| <b>Dairy</b>                                                            | Known as Milk in HEI-2005                                                                                                      | 0-10               | ≥1.3 cups/1,000 kcal               | No intake                             |
| <b>Total protein foods<sup>‡</sup></b>                                  | Known as Meat and beans (maximum score 10) in HEI-2005                                                                         | 0-5                | ≥2.5 ounces/1,000 kcal             | No intake                             |
| <b>Seafood and plant proteins<sup>††</sup></b>                          | Newly added component in HEI-2010                                                                                              | 0-5                | ≥0.8 ounces/1,000 kcal             | No intake                             |
| <b>Fatty acids<sup>‡‡</sup></b>                                         | Replaces two components (Oils and Saturated fat) in HEI-2005                                                                   | 0-10               | (PUFAs+MUFAs)/SFAs ≥2.5            | (PUFAs+MUFAs)/SFAs ≤1.2               |
| <i>Moderation components (higher score indicates lower consumption)</i> |                                                                                                                                |                    |                                    |                                       |
| <b>Refined grains</b>                                                   | Replaces the adequacy component (total grains) in HEI-2005                                                                     | 0-10               | ≤1.8 ounces/1,000 kcal             | ≥4.3 ounces/1,000 kcal                |

|                                     |                                                                                                                            |      |                            |                             |
|-------------------------------------|----------------------------------------------------------------------------------------------------------------------------|------|----------------------------|-----------------------------|
| <b>Sodium</b>                       | Minor change of the scoring standard from HEI-2005                                                                         | 0-10 | $\leq 1.1$ gram/1,000 kcal | $\geq 2.0$ grams/1,000 kcal |
| <b>Empty calories<sup>†††</sup></b> | Known as Calories from Solid Fats, Alcoholic beverages, and Added Sugars in HEI-2005, minor change of the scoring standard | 0-20 | $\leq 19\%$ kcal           | $\geq 50\%$ kcal            |

\* 1 ounce = 28.35 g; 1 cup = 0.24 L. 12 components were scored for a total of 0 to 100 points. Intakes between the minimum and maximum standards are scored proportionately.

<sup>†</sup> Beans and peas are included here when not counted as total protein foods.

<sup>‡</sup> Beans and peas are included here (and not with vegetables) when the total protein foods standard is otherwise not met.

<sup>††</sup> Including seafood, nuts, seeds, soy products (other than beverages) as well as beans and peas counted as total protein foods. Beans and peas are included here (and not with vegetables) when the total protein foods standard is otherwise not met.

<sup>‡‡</sup> Fatty acids, a ratio of poly-unsaturated fatty acids (PUFAs) and mono-unsaturated fatty acids (MUFAs) to saturated fatty acids (SFAs), replaces Oils and Saturated fat to acknowledge the recommendation to replace saturated fat with mono- and polyunsaturated fatty acids.

<sup>†††</sup> Calories from solid fats, alcohol and added sugars. Threshold for counting alcohol is  $>13$  grams/1,000 kcal.

**Supplementary Table 3.** Hazard ratios (HRs) and 95% confidence intervals (CIs) for hepatocellular carcinoma (HCC) incidence and chronic liver disease (CLD) mortality by quintiles of the Healthy Eating Index-2005 (HEI-2005)

| <b>HEI-2005</b>                                | <b>Quintile 1</b><br><b>(n=98,988)</b> | <b>Quintile 2</b><br><b>(n=98,989)</b> | <b>Quintile 3</b><br><b>(n=98,988)</b> | <b>Quintile 4</b><br><b>(n=98,989)</b> | <b>Quintile 5</b><br><b>(n=98,988)</b> | <b><i>P</i>-trend*</b> |
|------------------------------------------------|----------------------------------------|----------------------------------------|----------------------------------------|----------------------------------------|----------------------------------------|------------------------|
| <b>HCC</b>                                     |                                        |                                        |                                        |                                        |                                        |                        |
| No. of Cases                                   | 150                                    | 94                                     | 95                                     | 88                                     | 82                                     |                        |
| Age and sex-adjusted HR (95% CI)               | 1.00                                   | 0.63 (0.49-0.82)                       | 0.65 (0.50-0.84)                       | 0.62 (0.48-0.81)                       | 0.60 (0.46-0.79)                       | <0.0001                |
| Multivariate-adjusted HR <sup>†</sup> (95% CI) | 1.00                                   | 0.71 (0.54-0.92)                       | 0.77 (0.58-1.01)                       | 0.73 (0.54-0.98)                       | 0.71 (0.52-0.96)                       | 0.03                   |
| <b>CLD</b>                                     |                                        |                                        |                                        |                                        |                                        |                        |
| No. of Cases                                   | 440                                    | 212                                    | 164                                    | 125                                    | 112                                    |                        |
| Age and sex-adjusted HR (95% CI)               | 1.00                                   | 0.47 (0.40-0.55)                       | 0.36 (0.30-0.43)                       | 0.27 (0.23-0.34)                       | 0.25 (0.20-0.30)                       | <0.0001                |
| Multivariate-adjusted HR <sup>†</sup> (95% CI) | 1.00                                   | 0.66 (0.56-0.79)                       | 0.60 (0.49-0.72)                       | 0.50 (0.40-0.63)                       | 0.48 (0.38-0.60)                       | <0.0001                |

\* Multivariable models were adjusted for age, sex, race, smoking (never, former  $\leq 1$ , former  $> 1$ , current  $\leq 1$ , or current  $> 1$  pack/day), alcohol intake (0,  $> 0$ -0.5,  $> 0.5$ -1,  $> 1$ -2,  $> 2$ -4, or  $> 4$  drinks/day), education, BMI ( $< 18.5$ , 18.5-24.9, 25.0-29.9, 30.0-34.9, or  $\geq 35.0$  kg/m<sup>2</sup>), diabetes, usual activity throughout the day, vigorous physical activity, and total energy intake.

**Supplementary Table 4. Association of components in Health Eating Index-2005 with HCC incidence and CLD mortality**

|                                                                        | <b>Criteria for maximum score*</b> | <b>HCC, HR<sup>†</sup>(95% CI)</b> | <b>CLD, HR<sup>†</sup>(95% CI)</b> |
|------------------------------------------------------------------------|------------------------------------|------------------------------------|------------------------------------|
| <b>Total grains</b>                                                    | ≥3 ounces/1,000 kcal               | 0.87 (0.79-0.95)                   | 0.74 (0.70-0.79)                   |
| <b>Whole grains</b>                                                    | ≥1.5 ounces/1,000 kcal             | 0.94 (0.87-1.02)                   | 0.84 (0.79-0.89)                   |
| <b>Total vegetables</b>                                                | ≥1.1 cups/1,000 kcal               | 0.90 (0.83-0.97)                   | 0.98 (0.93-1.04)                   |
| <b>Dark-green and orange vegetables and legumes</b>                    | ≥0.4 cups/1,000 kcal               | 0.89 (0.83-0.95)                   | 0.94 (0.90-0.99)                   |
| <b>Total fruit</b>                                                     | ≥0.8 cups/1,000 kcal               | 1.09 (1.01-1.17)                   | 1.12 (1.07-1.17)                   |
| <b>Whole fruits (not juice)</b>                                        | ≥0.4 cups/1,000 kcal               | 1.05 (0.97-1.12)                   | 1.08 (1.03-1.13)                   |
| <b>Milk</b>                                                            | ≥1.3 cups/1,000 kcal               | 1.02 (0.99-1.05)                   | 0.96 (0.94-0.98)                   |
| <b>Meat and beans</b>                                                  | ≥2.5 ounces/1,000 kcal             | 0.96 (0.92-1.01)                   | 0.93 (0.90-0.95)                   |
| <b>Oils</b>                                                            | ≥12 g/1,000 kcal                   | 0.99 (0.96-1.03)                   | 0.99 (0.96-1.01)                   |
| <b>Saturated fat</b>                                                   | ≤7% kcal                           | 0.96 (0.93-0.99)                   | 0.97 (0.95-0.99)                   |
| <b>Sodium</b>                                                          | ≤700 mg/1,000 kcal                 | 1.04 (0.99-1.09)                   | 1.02 (0.99-1.06)                   |
| <b>Calories from Solid Fats, Alcoholic beverages, and Added Sugars</b> | ≤20% kcal                          | 0.98 (0.96-1.00)                   | 0.99 (0.98-1.01)                   |

\* 1 ounce = 28.35 g; 1 cup = 0.24 L.

† HR for one point change of each component. Multivariable models were adjusted for age, sex, race, smoking (never, former ≤1, former >1, current ≤1, or current >1 pack/day), alcohol intake (0, >0-0.5, >0.5-1, >1-2, >2-4, or >4 drinks/day), education, BMI (<18.5, 18.5-24.9, 25.0-29.9, 30.0-34.9, or ≥35.0 kg/m<sup>2</sup>), diabetes, usual activity throughout the day, vigorous physical activity, total energy intake, and a modified score that lacked the particular component.
